# Supplementary material
Source: PubMed Central journal article supplement (PMC2878394)
Supplement: NIHMS202141-supplement-2_si_002.pdf [file NIHMS202141-supplement-2_si_002.pdf]

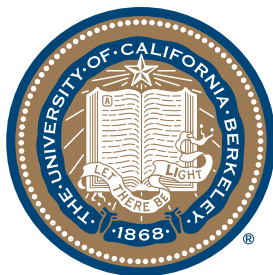

University of California, Berkeley  
College of Chemistry  
X-ray Crystallography Facility

# X-ray Crystal Structure Report

Sample ID: VM-iodolactone

X-ray ID: SARPONG12

Submitted by: Vishnu Maya

Laboratory: Prof. Richmond Sarpong

Report Date: January 25, 2010

If you have any questions or concerns regarding the information contained in this report, please contact Dr. Antonio DiPasquale ([adipasqu@berkeley.edu](mailto:adipasqu@berkeley.edu)).

**Read - Important!!!** The content of this report is intended only for the investigator, laboratory, or group listed above that requested the performed research and could contain confidential and/or privileged material. Any review, retransmission, distribution or other use of, or taking of any action in reliance upon, this information by persons or parties other than the intended recipient(s) without their expressed permission is strictly prohibited. If you receive a copy of this report by mistake, please destroy all copies (electronic or hard) and do not disseminate any information that may be contained in it to anyone. Your further reading of this report constitutes your agreement with this disclaimer.

A colorless prism 0.12 x 0.10 x 0.10 mm in size was mounted on a Cryoloop with Paratone oil. Data were collected in a nitrogen gas stream at 100(2) K using phi and omega scans. Crystal-to-detector distance was 60 mm and exposure time was 5 seconds per frame using a scan width of 1.0°. Data collection was 100.0% complete to 67.00° in  $\theta$ . A total of 19318 reflections were collected covering the indices,  $-8 \leq h \leq 11$ ,  $-8 \leq k \leq 9$ ,  $-24 \leq l \leq 24$ . 2781 reflections were found to be symmetry independent, with an  $R_{\text{int}}$  of 0.0247. Indexing and unit cell refinement indicated a primitive, monoclinic lattice. The space group was found to be P2(1)/c (No. 14). The data were integrated using the Bruker SAINT software program and scaled using the SADABS software program. Solution by direct methods (SIR-2004) produced a complete heavy-atom phasing model consistent with the proposed structure. All non-hydrogen atoms were refined anisotropically by full-matrix least-squares (SHELXL-97). All hydrogen atoms were placed using a riding model. Their positions were constrained relative to their parent atom using the appropriate HFIX command in SHELXL-97.

Table 1. Crystal data and structure refinement for sarpong12.

|                                   |                                                    |                 |
|-----------------------------------|----------------------------------------------------|-----------------|
| X-ray ID                          | sarpong12                                          |                 |
| Sample/notebook ID                | VM-iodolactone                                     |                 |
| Empirical formula                 | C <sub>16</sub> H <sub>18</sub> I N O <sub>3</sub> |                 |
| Formula weight                    | 399.21                                             |                 |
| Temperature                       | 100(2) K                                           |                 |
| Wavelength                        | 1.54178 Å                                          |                 |
| Crystal system                    | Monoclinic                                         |                 |
| Space group                       | P2(1)/c                                            |                 |
| Unit cell dimensions              | a = 9.6608(9) Å                                    | α = 90°.        |
|                                   | b = 7.7675(7) Å                                    | β = 91.435(3)°. |
|                                   | c = 20.3906(19) Å                                  | γ = 90°.        |
| Volume                            | 1529.6(2) Å <sup>3</sup>                           |                 |
| Z                                 | 4                                                  |                 |
| Density (calculated)              | 1.734 Mg/m <sup>3</sup>                            |                 |
| Absorption coefficient            | 16.536 mm <sup>-1</sup>                            |                 |
| F(000)                            | 792                                                |                 |
| Crystal size                      | 0.12 x 0.10 x 0.10 mm <sup>3</sup>                 |                 |
| Crystal color/habit               | colorless prism                                    |                 |
| Theta range for data collection   | 4.34 to 68.18°.                                    |                 |
| Index ranges                      | -8 ≤ h ≤ 11, -8 ≤ k ≤ 9, -24 ≤ l ≤ 24              |                 |
| Reflections collected             | 19318                                              |                 |
| Independent reflections           | 2781 [R(int) = 0.0247]                             |                 |
| Completeness to theta = 67.00°    | 100.0 %                                            |                 |
| Absorption correction             | Semi-empirical from equivalents                    |                 |
| Max. and min. transmission        | 0.2886 and 0.2416                                  |                 |
| Refinement method                 | Full-matrix least-squares on F <sup>2</sup>        |                 |
| Data / restraints / parameters    | 2781 / 0 / 192                                     |                 |
| Goodness-of-fit on F <sup>2</sup> | 1.116                                              |                 |
| Final R indices [I > 2σ(I)]       | R1 = 0.0196, wR2 = 0.0509                          |                 |
| R indices (all data)              | R1 = 0.0199, wR2 = 0.0510                          |                 |
| Largest diff. peak and hole       | 0.865 and -0.547 e.Å <sup>-3</sup>                 |                 |

Table 2. Atomic coordinates ( $\times 10^4$ ) and equivalent isotropic displacement parameters ( $\text{\AA}^2 \times 10^3$ ) for sarpong12.  $U(\text{eq})$  is defined as one third of the trace of the orthogonalized  $U^{ij}$  tensor.

|       | x        | y        | z       | $U(\text{eq})$ |
|-------|----------|----------|---------|----------------|
| C(1)  | 1046(2)  | 1454(3)  | 6215(1) | 12(1)          |
| C(2)  | 1295(3)  | -34(3)   | 5763(1) | 14(1)          |
| C(3)  | 2059(2)  | -1355(3) | 6207(1) | 13(1)          |
| C(4)  | 3069(2)  | -2510(3) | 5851(1) | 13(1)          |
| C(5)  | 4410(2)  | -1584(3) | 5654(1) | 12(1)          |
| C(6)  | 5125(2)  | -980(3)  | 6291(1) | 11(1)          |
| C(7)  | 4245(2)  | 318(3)   | 6653(1) | 10(1)          |
| C(8)  | 2737(2)  | -289(3)  | 6775(1) | 11(1)          |
| C(9)  | 1816(2)  | 1293(3)  | 6795(1) | 12(1)          |
| C(10) | 1733(2)  | 2599(3)  | 7261(1) | 14(1)          |
| C(11) | 894(2)   | 3992(3)  | 7120(1) | 16(1)          |
| C(12) | 171(2)   | 4024(3)  | 6512(1) | 14(1)          |
| C(13) | 5287(2)  | -2787(3) | 5244(1) | 15(1)          |
| C(14) | 2921(2)  | -1235(3) | 7428(1) | 13(1)          |
| C(15) | 4134(3)  | -349(3)  | 7759(1) | 13(1)          |
| C(16) | -1373(3) | 5483(4)  | 5777(1) | 26(1)          |
| N(1)  | 219(2)   | 2792(3)  | 6064(1) | 14(1)          |
| O(1)  | 4831(2)  | 604(2)   | 7308(1) | 13(1)          |
| O(2)  | 4510(2)  | -359(2)  | 8325(1) | 19(1)          |
| O(3)  | -628(2)  | 5428(2)  | 6396(1) | 19(1)          |
| I(1)  | 7125(1)  | 266(1)   | 6135(1) | 12(1)          |

Table 3. Bond lengths [ $\text{\AA}$ ] and angles [ $^\circ$ ] for sarpong12.

|                  |            |                  |            |
|------------------|------------|------------------|------------|
| C(1)-N(1)        | 1.343(3)   | C(8)-C(9)        | 1.518(3)   |
| C(1)-C(9)        | 1.388(3)   | C(8)-C(14)       | 1.528(3)   |
| C(1)-C(2)        | 1.502(3)   | C(9)-C(10)       | 1.394(3)   |
| C(2)-C(3)        | 1.544(3)   | C(10)-C(11)      | 1.377(3)   |
| C(2)-H(2A)       | 0.9900     | C(10)-H(10)      | 0.9500     |
| C(2)-H(2B)       | 0.9900     | C(11)-C(12)      | 1.408(3)   |
| C(3)-C(4)        | 1.523(3)   | C(11)-H(11)      | 0.9500     |
| C(3)-C(8)        | 1.555(3)   | C(12)-N(1)       | 1.325(3)   |
| C(3)-H(3)        | 1.0000     | C(12)-O(3)       | 1.353(3)   |
| C(4)-C(5)        | 1.544(3)   | C(13)-H(13A)     | 0.9800     |
| C(4)-H(4A)       | 0.9900     | C(13)-H(13B)     | 0.9800     |
| C(4)-H(4B)       | 0.9900     | C(13)-H(13C)     | 0.9800     |
| C(5)-C(13)       | 1.525(3)   | C(14)-C(15)      | 1.504(3)   |
| C(5)-C(6)        | 1.530(3)   | C(14)-H(14A)     | 0.9900     |
| C(5)-H(5)        | 1.0000     | C(14)-H(14B)     | 0.9900     |
| C(6)-C(7)        | 1.522(3)   | C(15)-O(2)       | 1.201(3)   |
| C(6)-I(1)        | 2.190(2)   | C(15)-O(1)       | 1.370(3)   |
| C(6)-H(6)        | 1.0000     | C(16)-O(3)       | 1.437(3)   |
| C(7)-O(1)        | 1.456(3)   | C(16)-H(16A)     | 0.9800     |
| C(7)-C(8)        | 1.556(3)   | C(16)-H(16B)     | 0.9800     |
| C(7)-H(7)        | 1.0000     | C(16)-H(16C)     | 0.9800     |
| N(1)-C(1)-C(9)   | 124.7(2)   | C(4)-C(3)-H(3)   | 107.5      |
| N(1)-C(1)-C(2)   | 123.9(2)   | C(2)-C(3)-H(3)   | 107.5      |
| C(9)-C(1)-C(2)   | 111.3(2)   | C(8)-C(3)-H(3)   | 107.5      |
| C(1)-C(2)-C(3)   | 103.45(19) | C(3)-C(4)-C(5)   | 113.66(19) |
| C(1)-C(2)-H(2A)  | 111.1      | C(3)-C(4)-H(4A)  | 108.8      |
| C(3)-C(2)-H(2A)  | 111.1      | C(5)-C(4)-H(4A)  | 108.8      |
| C(1)-C(2)-H(2B)  | 111.1      | C(3)-C(4)-H(4B)  | 108.8      |
| C(3)-C(2)-H(2B)  | 111.1      | C(5)-C(4)-H(4B)  | 108.8      |
| H(2A)-C(2)-H(2B) | 109.0      | H(4A)-C(4)-H(4B) | 107.7      |
| C(4)-C(3)-C(2)   | 114.52(19) | C(13)-C(5)-C(6)  | 114.08(18) |
| C(4)-C(3)-C(8)   | 113.88(18) | C(13)-C(5)-C(4)  | 109.77(18) |
| C(2)-C(3)-C(8)   | 105.64(19) | C(6)-C(5)-C(4)   | 106.61(17) |

|                   |            |                     |            |
|-------------------|------------|---------------------|------------|
| C(13)-C(5)-H(5)   | 108.8      | C(12)-C(11)-H(11)   | 120.8      |
| C(6)-C(5)-H(5)    | 108.8      | N(1)-C(12)-O(3)     | 119.4(2)   |
| C(4)-C(5)-H(5)    | 108.8      | N(1)-C(12)-C(11)    | 124.7(2)   |
| C(7)-C(6)-C(5)    | 111.63(18) | O(3)-C(12)-C(11)    | 115.9(2)   |
| C(7)-C(6)-I(1)    | 106.46(14) | C(5)-C(13)-H(13A)   | 109.5      |
| C(5)-C(6)-I(1)    | 113.19(14) | C(5)-C(13)-H(13B)   | 109.5      |
| C(7)-C(6)-H(6)    | 108.5      | H(13A)-C(13)-H(13B) | 109.5      |
| C(5)-C(6)-H(6)    | 108.5      | C(5)-C(13)-H(13C)   | 109.5      |
| I(1)-C(6)-H(6)    | 108.5      | H(13A)-C(13)-H(13C) | 109.5      |
| O(1)-C(7)-C(6)    | 109.68(17) | H(13B)-C(13)-H(13C) | 109.5      |
| O(1)-C(7)-C(8)    | 104.09(17) | C(15)-C(14)-C(8)    | 104.07(18) |
| C(6)-C(7)-C(8)    | 114.42(18) | C(15)-C(14)-H(14A)  | 110.9      |
| O(1)-C(7)-H(7)    | 109.5      | C(8)-C(14)-H(14A)   | 110.9      |
| C(6)-C(7)-H(7)    | 109.5      | C(15)-C(14)-H(14B)  | 110.9      |
| C(8)-C(7)-H(7)    | 109.5      | C(8)-C(14)-H(14B)   | 110.9      |
| C(9)-C(8)-C(14)   | 114.84(19) | H(14A)-C(14)-H(14B) | 109.0      |
| C(9)-C(8)-C(3)    | 102.41(18) | O(2)-C(15)-O(1)     | 120.4(2)   |
| C(14)-C(8)-C(3)   | 115.53(19) | O(2)-C(15)-C(14)    | 129.9(2)   |
| C(9)-C(8)-C(7)    | 108.10(18) | O(1)-C(15)-C(14)    | 109.68(19) |
| C(14)-C(8)-C(7)   | 101.33(18) | O(3)-C(16)-H(16A)   | 109.5      |
| C(3)-C(8)-C(7)    | 114.90(19) | O(3)-C(16)-H(16B)   | 109.5      |
| C(1)-C(9)-C(10)   | 118.5(2)   | H(16A)-C(16)-H(16B) | 109.5      |
| C(1)-C(9)-C(8)    | 110.6(2)   | O(3)-C(16)-H(16C)   | 109.5      |
| C(10)-C(9)-C(8)   | 130.7(2)   | H(16A)-C(16)-H(16C) | 109.5      |
| C(11)-C(10)-C(9)  | 118.3(2)   | H(16B)-C(16)-H(16C) | 109.5      |
| C(11)-C(10)-H(10) | 120.9      | C(12)-N(1)-C(1)     | 115.6(2)   |
| C(9)-C(10)-H(10)  | 120.9      | C(15)-O(1)-C(7)     | 110.33(17) |
| C(10)-C(11)-C(12) | 118.3(2)   | C(12)-O(3)-C(16)    | 116.64(19) |
| C(10)-C(11)-H(11) | 120.8      |                     |            |

---

Symmetry transformations used to generate equivalent atoms:

Table 4. Anisotropic displacement parameters ( $\text{\AA}^2 \times 10^3$ ) for sarpong12. The anisotropic displacement factor exponent takes the form:  $-2\pi^2 [ h^2 a^{*2} U^{11} + \dots + 2 h k a^* b^* U^{12} ]$

|       | U <sup>11</sup> | U <sup>22</sup> | U <sup>33</sup> | U <sup>23</sup> | U <sup>13</sup> | U <sup>12</sup> |
|-------|-----------------|-----------------|-----------------|-----------------|-----------------|-----------------|
| C(1)  | 7(1)            | 16(1)           | 14(1)           | 0(1)            | -1(1)           | 0(1)            |
| C(2)  | 11(1)           | 18(1)           | 14(1)           | -3(1)           | -6(1)           | 3(1)            |
| C(3)  | 10(1)           | 14(1)           | 14(1)           | -1(1)           | -5(1)           | -2(1)           |
| C(4)  | 13(1)           | 11(1)           | 16(1)           | -3(1)           | -7(1)           | 0(1)            |
| C(5)  | 14(1)           | 10(1)           | 10(1)           | -2(1)           | -5(1)           | 2(1)            |
| C(6)  | 9(1)            | 11(1)           | 12(1)           | 0(1)            | -3(1)           | -1(1)           |
| C(7)  | 10(1)           | 12(1)           | 8(1)            | -1(1)           | -5(1)           | 0(1)            |
| C(8)  | 10(1)           | 13(1)           | 10(1)           | -1(1)           | -3(1)           | -1(1)           |
| C(9)  | 8(1)            | 14(1)           | 13(1)           | 1(1)            | -1(1)           | -1(1)           |
| C(10) | 12(1)           | 19(1)           | 12(1)           | -1(1)           | -2(1)           | 0(1)            |
| C(11) | 14(1)           | 16(1)           | 17(1)           | -4(1)           | -2(1)           | 1(1)            |
| C(12) | 9(1)            | 15(1)           | 17(1)           | 2(1)            | 0(1)            | 3(1)            |
| C(13) | 17(1)           | 14(1)           | 14(1)           | -3(1)           | -5(1)           | 5(1)            |
| C(14) | 14(1)           | 14(1)           | 12(1)           | 2(1)            | -2(1)           | -1(1)           |
| C(15) | 14(1)           | 12(1)           | 13(1)           | -1(1)           | -1(1)           | 3(1)            |
| C(16) | 27(2)           | 25(1)           | 24(1)           | 1(1)            | -10(1)          | 13(1)           |
| N(1)  | 11(1)           | 18(1)           | 14(1)           | -1(1)           | -2(1)           | 2(1)            |
| O(1)  | 14(1)           | 17(1)           | 10(1)           | -2(1)           | -4(1)           | -2(1)           |
| O(2)  | 24(1)           | 22(1)           | 11(1)           | -1(1)           | -6(1)           | -2(1)           |
| O(3)  | 16(1)           | 19(1)           | 21(1)           | -1(1)           | -5(1)           | 7(1)            |
| I(1)  | 9(1)            | 15(1)           | 11(1)           | -1(1)           | -3(1)           | 1(1)            |

Table 5. Hydrogen coordinates ( $\times 10^4$ ) and isotropic displacement parameters ( $\text{\AA}^2 \times 10^3$ ) for sarpong12.

|        | x     | y     | z    | U(eq) |
|--------|-------|-------|------|-------|
| H(2A)  | 1874  | 316   | 5392 | 17    |
| H(2B)  | 410   | -511  | 5587 | 17    |
| H(3)   | 1342  | -2114 | 6402 | 15    |
| H(4A)  | 2603  | -2974 | 5451 | 16    |
| H(4B)  | 3317  | -3496 | 6138 | 16    |
| H(5)   | 4156  | -551  | 5384 | 14    |
| H(6)   | 5281  | -2003 | 6581 | 13    |
| H(7)   | 4222  | 1431  | 6406 | 12    |
| H(10)  | 2241  | 2532  | 7665 | 17    |
| H(11)  | 805   | 4906  | 7425 | 19    |
| H(13A) | 6132  | -2190 | 5116 | 22    |
| H(13B) | 4758  | -3135 | 4849 | 22    |
| H(13C) | 5535  | -3810 | 5503 | 22    |
| H(14A) | 2081  | -1128 | 7693 | 16    |
| H(14B) | 3119  | -2470 | 7357 | 16    |
| H(16A) | -716  | 5439  | 5419 | 39    |
| H(16B) | -1909 | 6553  | 5746 | 39    |
| H(16C) | -2003 | 4496  | 5744 | 39    |
